# Supplementary material
Source: PubMed Central journal article supplement (PMC4321730)
Supplement: NIHMS569126-supplement-03.pdf [file NIHMS569126-supplement-03.pdf]

Supplementary Table 1: P values for mRNA-mRNA and miRNA-miRNA Spearman rank correlations.

| mRNA/mRNA        | AKR1D1 | CEBP $\alpha$ | CYP2B6 | CYP2C19 | CYP2C9 | CYP3A4 | EHHADH | FOXA2 | HNF4 $\alpha$ | HNF4 $\gamma$ | NCOA6 | NCOR2 | NR112 | NR113 | NR3C1 | PPARGC1 $\alpha$ | RXR $\alpha$ | SLC10A1 |
|------------------|--------|---------------|--------|---------|--------|--------|--------|-------|---------------|---------------|-------|-------|-------|-------|-------|------------------|--------------|---------|
| AKR1D1           |        |               |        |         |        |        |        |       |               |               |       |       |       |       |       |                  |              |         |
| CEBP $\alpha$    | 0.017  |               |        |         |        |        |        |       |               |               |       |       |       |       |       |                  |              |         |
| CYP2B6           | 0.033  | 0.455         |        |         |        |        |        |       |               |               |       |       |       |       |       |                  |              |         |
| CYP2C19          | 0.000  | 0.369         | 0.023  |         |        |        |        |       |               |               |       |       |       |       |       |                  |              |         |
| CYP2C9           | 0.000  | 0.026         | 0.000  | 0.056   |        |        |        |       |               |               |       |       |       |       |       |                  |              |         |
| CYP3A4           | 0.001  | 0.726         | 0.115  | 0.000   | 0.002  |        |        |       |               |               |       |       |       |       |       |                  |              |         |
| EHHADH           | 0.000  | 0.001         | 0.094  | 0.180   | 0.000  | 0.005  |        |       |               |               |       |       |       |       |       |                  |              |         |
| FOXA2            | 0.003  | 0.104         | 0.015  | 0.156   | 0.001  | 0.023  | 0.000  |       |               |               |       |       |       |       |       |                  |              |         |
| HNF4 $\alpha$    | 0.001  | 0.000         | 0.167  | 0.002   | 0.001  | 0.006  | 0.000  | 0.001 |               |               |       |       |       |       |       |                  |              |         |
| HNF4 $\gamma$    | 0.003  | 0.000         | 0.633  | 0.589   | 0.001  | 0.092  | 0.000  | 0.002 | 0.000         |               |       |       |       |       |       |                  |              |         |
| NCOA6            | 0.062  | 0.459         | 0.062  | 0.087   | 0.306  | 0.143  | 0.592  | 0.681 | 0.124         | 0.179         |       |       |       |       |       |                  |              |         |
| NCOR2            | 0.294  | 0.118         | 0.379  | 0.868   | 0.515  | 0.652  | 0.471  | 0.140 | 0.265         | 0.088         | 0.756 |       |       |       |       |                  |              |         |
| NR112            | 0.000  | 0.143         | 0.093  | 0.010   | 0.000  | 0.002  | 0.000  | 0.003 | 0.000         | 0.002         | 0.609 | 0.463 |       |       |       |                  |              |         |
| NR113            | 0.000  | 0.001         | 0.011  | 0.007   | 0.000  | 0.010  | 0.000  | 0.065 | 0.003         | 0.003         | 0.246 | 0.505 | 0.000 |       |       |                  |              |         |
| NR3C1            | 0.019  | 0.000         | 0.075  | 0.260   | 0.031  | 0.970  | 0.027  | 0.512 | 0.029         | 0.002         | 0.845 | 0.011 | 0.555 | 0.002 |       |                  |              |         |
| PPARGC1 $\alpha$ | 0.079  | 0.528         | 0.705  | 0.760   | 0.060  | 0.159  | 0.017  | 0.365 | 0.607         | 0.723         | 0.056 | 0.431 | 0.001 | 0.004 | 0.119 |                  |              |         |
| RXR $\alpha$     | 0.000  | 0.001         | 0.207  | 0.074   | 0.000  | 0.003  | 0.000  | 0.041 | 0.000         | 0.000         | 0.286 | 0.001 | 0.000 | 0.001 | 0.079 | 0.163            |              |         |
| SLC10A1          | 0.000  | 0.004         | 0.149  | 0.005   | 0.000  | 0.000  | 0.000  | 0.000 | 0.003         | 0.000         | 0.077 | 0.962 | 0.002 | 0.000 | 0.053 | 0.320            | 0.000        |         |

  

| miRNA/miRNA | miR-1 | miR-10a | miR-10b | miR-128a | miR-135a | miR-138 | miR-141 | miR-148a | miR-150 | miR-200a | miR-23a | miR-27a | miR-27b | miR-34a | miR-9 |
|-------------|-------|---------|---------|----------|----------|---------|---------|----------|---------|----------|---------|---------|---------|---------|-------|
| miR-1       |       |         |         |          |          |         |         |          |         |          |         |         |         |         |       |
| miR-10a     | 0.010 |         |         |          |          |         |         |          |         |          |         |         |         |         |       |
| miR-10b     | 0.001 | 0.002   |         |          |          |         |         |          |         |          |         |         |         |         |       |
| miR-128a    | 0.488 | 0.323   | 0.038   |          |          |         |         |          |         |          |         |         |         |         |       |
| miR-135a    | 0.695 | 0.660   | 0.068   | 0.768    |          |         |         |          |         |          |         |         |         |         |       |
| miR-138     | 0.089 | 0.743   | 0.556   | 0.292    | 0.132    |         |         |          |         |          |         |         |         |         |       |
| miR-141     | 0.188 | 0.680   | 0.194   | 0.041    | 0.063    | 0.296   |         |          |         |          |         |         |         |         |       |
| miR-148a    | 0.338 | 0.120   | 0.146   | 0.874    | 0.189    | 0.248   | 0.953   |          |         |          |         |         |         |         |       |
| miR-150     | 0.620 | 0.912   | 0.161   | 0.596    | 0.190    | 0.158   | 0.876   | 0.072    |         |          |         |         |         |         |       |
| miR-200a    | 0.879 | 0.662   | 0.486   | 0.201    | 0.009    | 0.000   | 0.015   | 0.130    | 0.165   |          |         |         |         |         |       |
| miR-23a     | 0.044 | 0.305   | 0.808   | 0.715    | 0.161    | 0.863   | 0.108   | 0.159    | 0.661   | 0.468    |         |         |         |         |       |
| miR-27a     | 0.625 | 0.156   | 0.622   | 0.003    | 0.379    | 0.089   | 0.005   | 0.602    | 0.132   | 0.002    | 0.010   |         |         |         |       |
| miR-27b     | 0.077 | 0.000   | 0.001   | 0.879    | 0.210    | 0.952   | 0.973   | 0.003    | 0.348   | 0.773    | 0.933   | 0.049   |         |         |       |
| miR-34a     | 0.565 | 0.003   | 0.406   | 0.998    | 0.044    | 0.085   | 0.647   | 0.090    | 0.016   | 0.005    | 0.530   | 0.005   | 0.346   |         |       |
| miR-9       | 0.003 | 0.464   | 0.046   | 0.054    | 0.906    | 0.668   | 0.572   | 0.505    | 0.114   | 0.699    | 0.222   | 0.108   | 0.858   | 0.469   |       |

p values <0.05 are shaded
