# Supplementary material
Source: PubMed Central journal article supplement (PMC4321730)
Supplement: NIHMS569126-supplement-04.pdf [file NIHMS569126-supplement-04.pdf]

| Supplementary Table 2. P values for hepatic mRNA-miRNA Spearman rank correlations. |              |         |              |              |              |              |              |              |              |              |              |              |              |              |              |  |
|------------------------------------------------------------------------------------|--------------|---------|--------------|--------------|--------------|--------------|--------------|--------------|--------------|--------------|--------------|--------------|--------------|--------------|--------------|--|
| mRNA/miRNA                                                                         | miR-1        | miR-10a | miR-10b      | miR-128a     | miR-135a     | miR-138      | miR-141      | miR-148a     | miR-150      | miR-200a     | miR-23a      | miR-27a      | miR-27b      | miR-34a      | miR-9        |  |
| AKR1D1                                                                             | 0.996        | 0.916   | 0.847        | 0.110        | 0.065        | 0.599        | 0.154        | <b>0.001</b> | 0.382        | 0.262        | <b>0.012</b> | <b>0.006</b> | <b>0.024</b> | <b>0.000</b> | 0.761        |  |
| CEBP $\alpha$                                                                      | 0.876        | 0.215   | 0.112        | 0.109        | 0.174        | 0.770        | 0.259        | 0.206        | 0.287        | 0.728        | 0.126        | 0.082        | 0.210        | 0.802        | <b>0.011</b> |  |
| CYP2B6                                                                             | 0.322        | 0.061   | 0.475        | 0.902        | 0.668        | 0.590        | 0.326        | <b>0.003</b> | 0.511        | 0.687        | 0.187        | 0.940        | <b>0.050</b> | 0.423        | <b>0.033</b> |  |
| CYP2C19                                                                            | 0.784        | 0.304   | 0.383        | 0.515        | 0.191        | 0.091        | 0.190        | <b>0.004</b> | 0.140        | 0.058        | 0.185        | <b>0.037</b> | 0.808        | <b>0.000</b> | 0.788        |  |
| CYP2C9                                                                             | <b>0.012</b> | 0.067   | 0.409        | 0.253        | 0.864        | 0.367        | 0.689        | <b>0.001</b> | 0.146        | 0.455        | <b>0.004</b> | 0.127        | <b>0.007</b> | 0.337        | 0.053        |  |
| CYP3A4                                                                             | 0.300        | 0.133   | 0.123        | 0.449        | 0.653        | 0.098        | 0.212        | <b>0.000</b> | <b>0.021</b> | 0.102        | 0.344        | 0.269        | 0.670        | <b>0.000</b> | 0.664        |  |
| EHHADH                                                                             | 0.447        | 0.077   | 0.470        | 0.132        | 0.240        | 0.794        | <b>0.026</b> | <b>0.001</b> | 0.257        | 0.489        | <b>0.003</b> | <b>0.020</b> | <b>0.009</b> | 0.152        | 0.492        |  |
| FOXA2                                                                              | 0.736        | 0.412   | 0.594        | 0.105        | 0.423        | 0.640        | 0.922        | <b>0.004</b> | 0.122        | 0.431        | 0.343        | <b>0.002</b> | 0.290        | 0.248        | 0.261        |  |
| HNF4 $\alpha$                                                                      | 0.979        | 0.978   | 0.653        | 0.504        | 0.632        | 0.766        | 0.857        | <b>0.014</b> | 0.067        | 0.711        | <b>0.007</b> | <b>0.006</b> | 0.634        | <b>0.040</b> | 0.117        |  |
| HNF4 $\gamma$                                                                      | 0.368        | 0.395   | 0.749        | <b>0.020</b> | 0.884        | 0.804        | 0.311        | 0.131        | 0.109        | 0.941        | 0.371        | 0.194        | 0.265        | 0.576        | 0.135        |  |
| NCOA6                                                                              | 0.820        | 0.303   | 0.073        | 0.930        | <b>0.017</b> | <b>0.045</b> | 0.774        | 0.077        | 0.251        | <b>0.011</b> | 0.260        | 0.496        | 0.132        | <b>0.000</b> | 0.088        |  |
| NCOR2                                                                              | 0.757        | 0.984   | 0.284        | 0.822        | 0.095        | <b>0.002</b> | 0.974        | 0.511        | 0.441        | <b>0.002</b> | 0.833        | <b>0.046</b> | 0.299        | 0.124        | 0.654        |  |
| NR1I2                                                                              | <b>0.039</b> | 0.302   | 0.061        | <b>0.033</b> | 0.648        | 0.547        | 0.283        | <b>0.004</b> | <b>0.003</b> | 0.607        | 0.080        | <b>0.006</b> | 0.060        | <b>0.018</b> | 0.414        |  |
| NR1I3                                                                              | 0.718        | 0.184   | 0.086        | 0.256        | <b>0.033</b> | 0.302        | 0.403        | <b>0.004</b> | <b>0.011</b> | 0.595        | 0.266        | 0.090        | <b>0.005</b> | <b>0.041</b> | 0.185        |  |
| NR3C1                                                                              | 0.988        | 0.272   | 0.163        | 0.947        | 0.895        | 0.768        | 0.649        | 0.059        | 0.929        | 0.673        | 0.433        | 0.727        | 0.147        | 0.946        | 0.165        |  |
| PPARGC1 $\alpha$                                                                   | <b>0.023</b> | 0.678   | <b>0.021</b> | 0.585        | 0.079        | 0.997        | 0.761        | <b>0.017</b> | 0.847        | 0.795        | 0.998        | 0.840        | 0.331        | 0.150        | 0.771        |  |
| RXR $\alpha$                                                                       | 0.582        | 0.324   | 0.444        | 0.056        | 0.216        | 0.537        | 0.656        | <b>0.001</b> | 0.208        | 0.409        | 0.131        | 0.285        | 0.060        | 0.156        | 0.657        |  |
| SLC10A1                                                                            | 0.195        | 0.635   | 0.414        | 0.111        | 0.080        | 0.610        | 0.105        | <b>0.001</b> | 0.092        | 0.178        | 0.395        | <b>0.006</b> | 0.072        | <b>0.004</b> | 0.988        |  |

Spearman rank correlation p values < 0.05 are bold and shaded
